# Supplementary material for: Discovery of the Universal tRNA Binding Mode for the TsaD-like Components of the t6A tRNA Modification Pathway
Source: MDPI journal article supplement (doi:10.3390/biophysica3020019), 2023-04-12
Supplement: s1 [file s1]

Archive with 1 entries (1 files):
- biophysica-2255239-supplementary.pdf
